# Supplementary material for: Graphene-amplified femtosensitive aptasensing of estradiol, an endocrine disruptor
Source: Royal Society of Chemistry journal article supplement (doi:10.1039/c7an02092a), 2018-01-01
Supplement: c7an02092a1.pdf [file c7an02092a1.pdf]

## Supplementary information

# Graphene amplified femtosensitive aptasensing of estradiol an endocrine disruptor

*Jahangir Ahmad Rather<sup>a\*</sup>, Emad A. Khudaish<sup>a</sup> and Palanisamy Kannan<sup>b</sup>*

<sup>a</sup>*Department of Chemistry, Sultan Qaboos University, Box 36, Al-Khod 123, Oman*

<sup>b</sup>*Singapore Center for Environmental Life Science Engineering (SCELSE), Nanyang Technological University, Singapore-637551*

*\*Corresponding author: (Dr. Jahangir Ahmad Rather)*

Email: [Jahangir@squ.edu.om](mailto:Jahangir@squ.edu.om)

Tel: +968-24141491

Fax: +968-24141491

### *Synthesis of graphene oxide (GO)*

In detail, graphite (1.0 g), NaNO<sub>3</sub> (1.0 g) and 46 mL of H<sub>2</sub>SO<sub>4</sub> (98%) were added into a flask under stirring in an ice bath. After the addition of KMnO<sub>4</sub> (6 g), the vessel was transferred into a water bath at about 35 °C and stirred for another 1 h to complete the deep oxidation. Next 70 mL of deionized water was slowly added and temperature was adjusted to 95°C and further stirred for another 2 h, when the diluted suspension turned brown, indicating the hydrolysis and absolute exfoliation of intercalated graphite oxide. Finally, this brown suspension was further treated with 30 mL of H<sub>2</sub>O<sub>2</sub> (30%) to reduce the residual oxidants and intermediates to soluble sulfate. Then this suspension was centrifuged at 10000 rpm for 20 min to remove the residual graphite, and washed with 1 molL<sup>-1</sup> HCl and deionized water repeatedly, and drying the product under vacuum to producing the graphene oxide (GO). The aqueous solution of graphene oxide (0.1 mg mL<sup>-1</sup>) was prepared by ultra-sonication for 30 min.

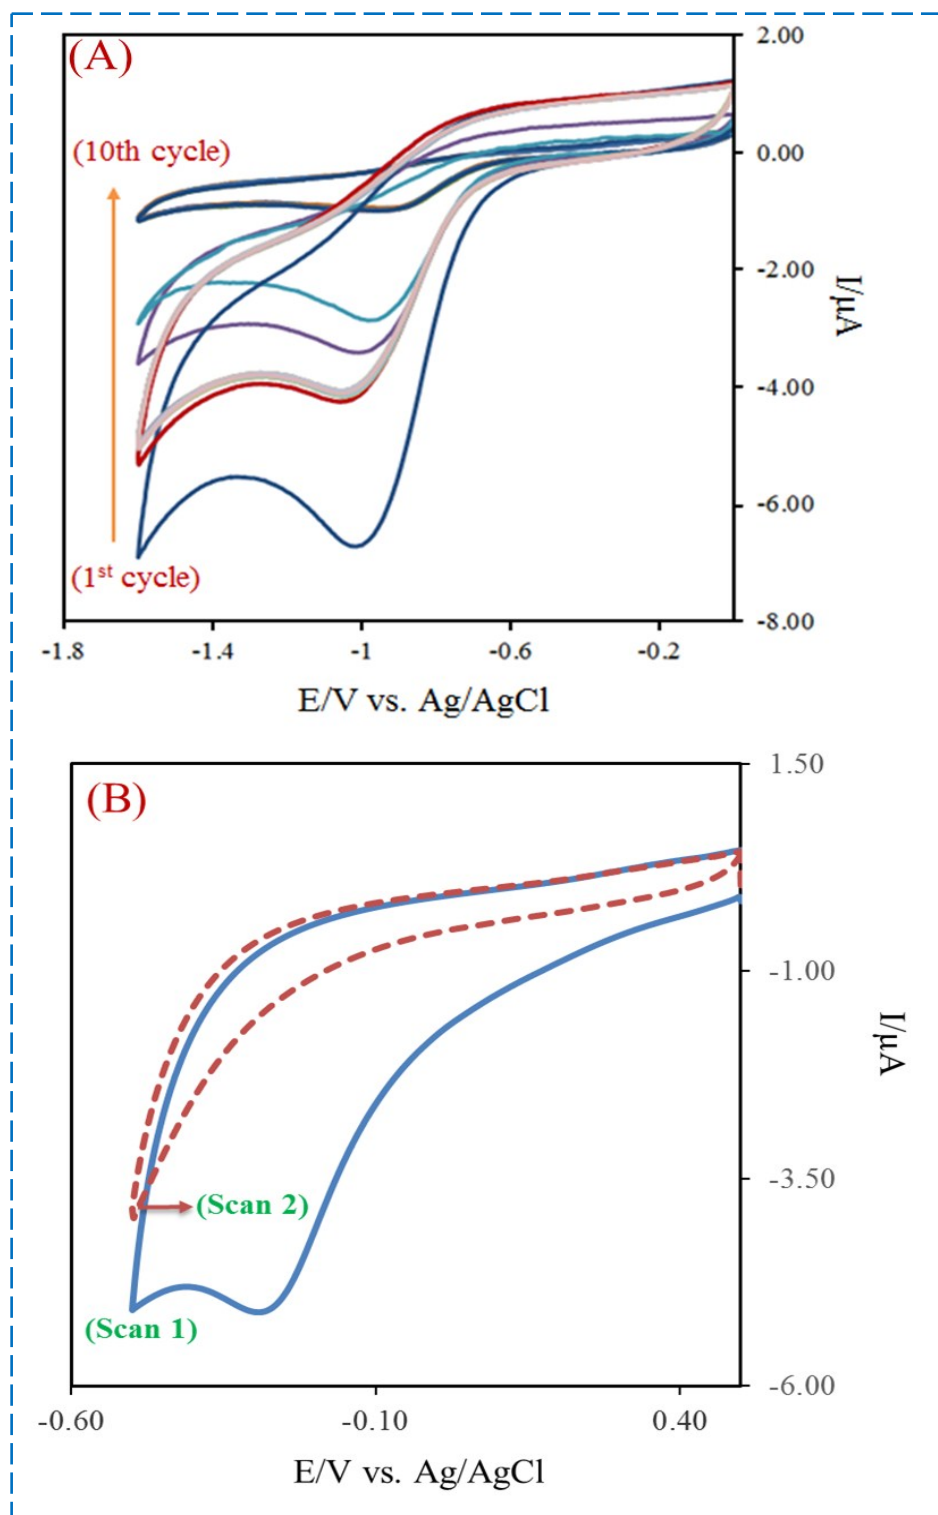

**Figure S1:** (A) Electrochemical deposition of GO at GCE to form modified electrode ERGO/GCE. (B) Electrochemical reduction of *p*-phenyl carboxyl diazonium salt ( $\text{Cl}^-\text{N}_2^+-\text{Ph}-\text{COOH}$ ) at ERGO/GCE (scan rate  $100 \text{ mVs}^{-1}$ ).
